# Supplementary material
Source: PubMed Central journal article supplement (PMC8154739)
Supplement: NIHMS1693735-supplement-3.pdf [file NIHMS1693735-supplement-3.pdf]

**Supplemental Table 1: qPCR primer information for genes of interest**

| Gene    | Accession Number | Forward Sequence               | Reverse Sequence               | Annealing Temperature (°C) |
|---------|------------------|--------------------------------|--------------------------------|----------------------------|
| SREBP1  | NM_001358315.1   | 5'-ACGAAGTGACACAAAAGCA-3'      | 5'-GCCAAAAGACAAGGGGCTAC-3'     | 58                         |
| CPT1A   | NM_013495.2      | 5'-TTGATCAAGAAGTGCCGGACGAGT-3' | 5'-GTCCATCATGGCCAGCACAAAGTT-3' | 60                         |
| CYP2B6  | KR711982.1       | 5'-CCATACACAGAGGCAGTCAT-3'     | 5'-GGTGCAGATCGATGTCTTC-3'      | 54.5                       |
| CD68    | NM_001291058.1   | 5'-CGCAGACGACAATCAACCTA-3'     | 5'-AGTGGCATGGTGAAGAGATG-3'     | 59                         |
| CYP2A5  | NM_007812.4      | 5'-CAAAGCCAAGGAAGCAAGATG-3'    | 5'-AGTGGTGCTGAGTGGTAATG-3'     | 60                         |
| CYP4A14 | NM_007822.2      | 5'-CCTCCTCATATTGCCCTGAATAG-3'  | 5'-GAGTCCATAGGCCTGAGTTATT-3'   | 59                         |
| PPARG   | NM_001127330.2   | 5'-TGGGTGAAACTCTGGGAGATTC-3'   | 5'-AATTTCTGTGAAGTGCTCATAGGC-3' | 60.1                       |
| HMGCR   | NM_008255.2      | 5'-TTAGGCATGTGGTGGTGAAG-3'     | 5'-GCCAAGGAGGAGCAGAATAAA-3'    | 60                         |
| 18S     | NR_003278.3      | 5'-ATGGCCGTTCTTAGTTGGTG-3'     | 5'-ATGCCAGAGTCTCGTTCGTT-3'     | 64                         |
| GAPDH   | NM_008084.3      | 5'-CCTTCATTGACCTCAACTA-3'      | 5'-CTGGAAGATGGTGATGG-3'        | 50                         |
| CYP2A13 | NM_000766.5      | 5'-TCTCCCACTTCTCCTCTGT-3'      | 5'-GGGAAGGAGGACAGACAATTAC-3'   | 59.8                       |

## GLUCOSE

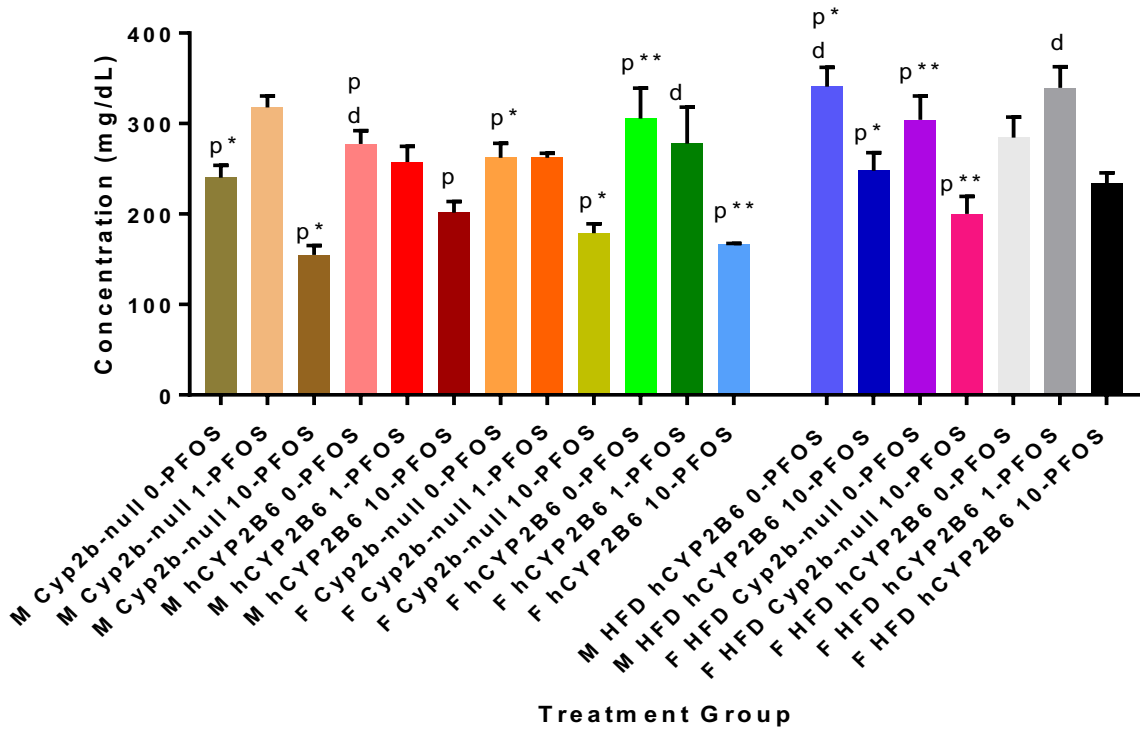

p = significant difference due to PFOS treatment  
 g = significant difference due to gender  
 d = significant difference due to diet  
 b = significant difference due to Cyp2b

**Supplemental Figure 1: Serum glucose levels (n = 5).** A serum panel was performed as mentioned in the Materials and Methods and glucose levels were measured. PFOS decreased serum glucose. Data are presented as mean  $\pm$  SEM. Statistical significance was determined by one-way ANOVA followed by Fisher's LSD as the post-hoc test. A letter indicates a  $p < 0.05$ , letter w/ \* indicates  $p < 0.01$ , letter w/ \*\* indicates  $p < 0.001$  and a letter w/ \*\*\* indicates  $p < 0.0001$ .

## TRIG

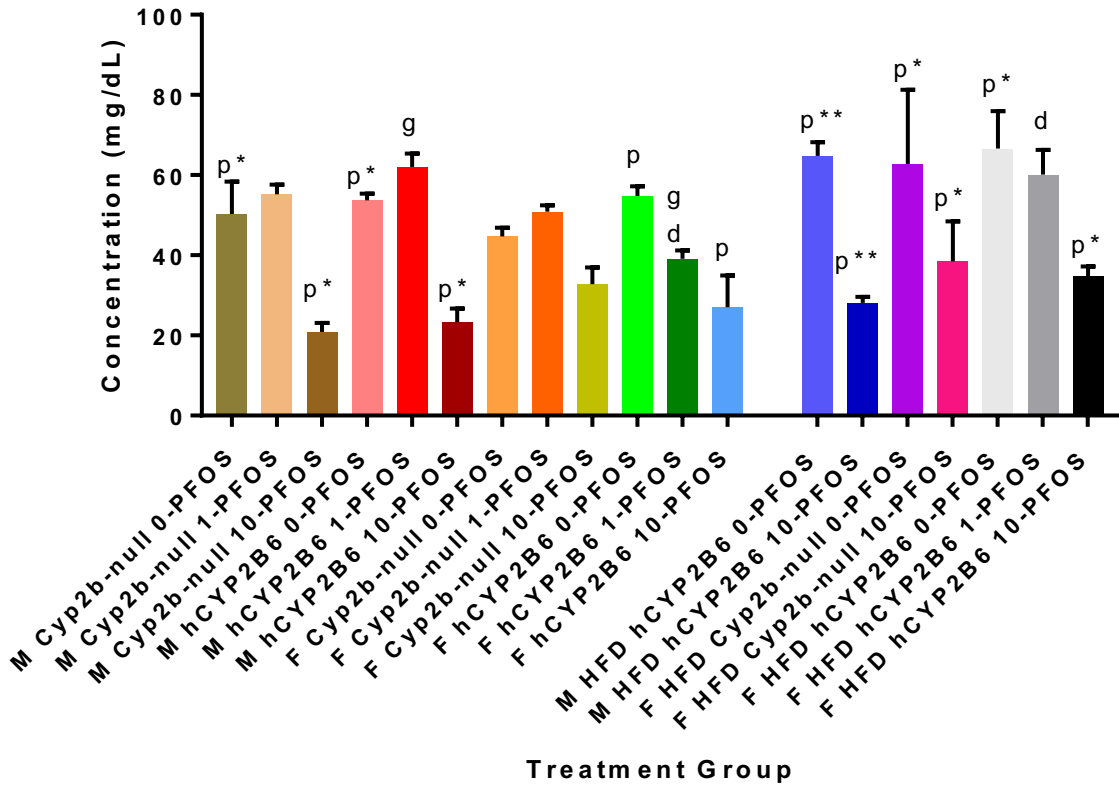

p = significant difference due to PFOS treatment  
 g = significant difference due to gender  
 d = significant difference due to diet  
 b = significant difference due to Cyp2b

**Supplemental Figure 2: Serum triglyceride levels (n=5).** A serum panel was performed as mentioned in the Materials and Methods and triglyceride levels were measured. PFOS significantly decreases serum triglyceride levels. Data are presented as mean  $\pm$  SEM. Statistical significance was determined by one-way ANOVA followed by Fisher's LSD as the post-hoc test. A letter indicates a  $p < 0.05$ , letter w/ \* indicates  $p < 0.01$ , letter w/ \*\* indicates  $p < 0.001$  and a letter w/ \*\*\* indicates  $p < 0.0001$ .

## Liver Cholesterol

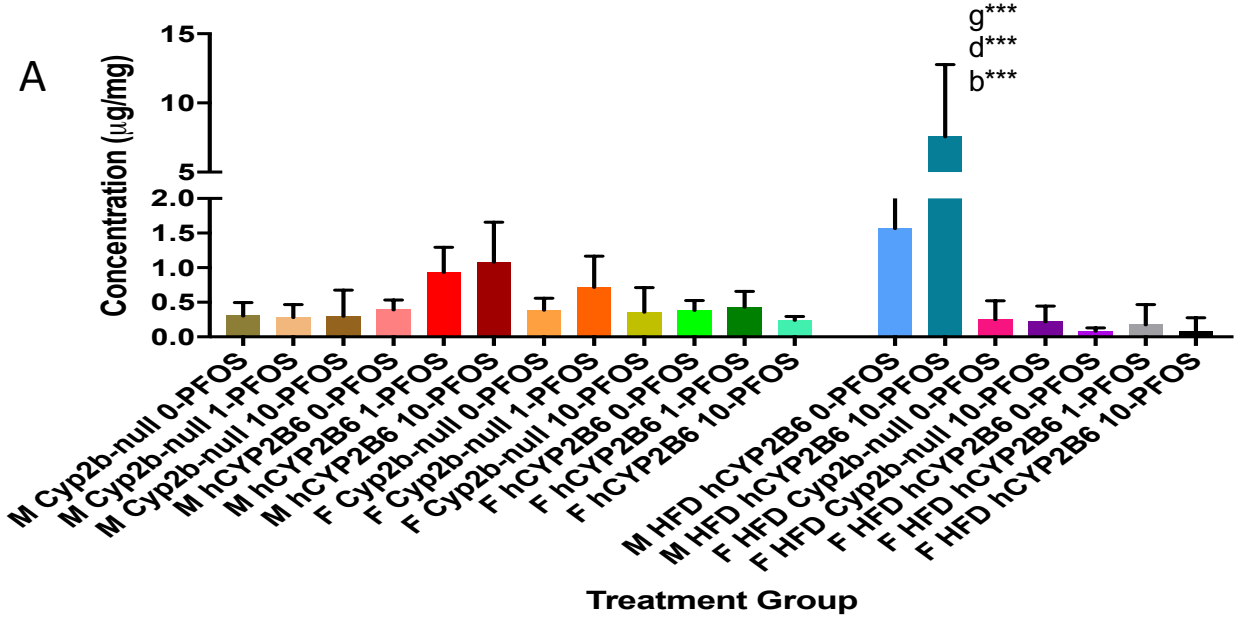

## Cholesterol

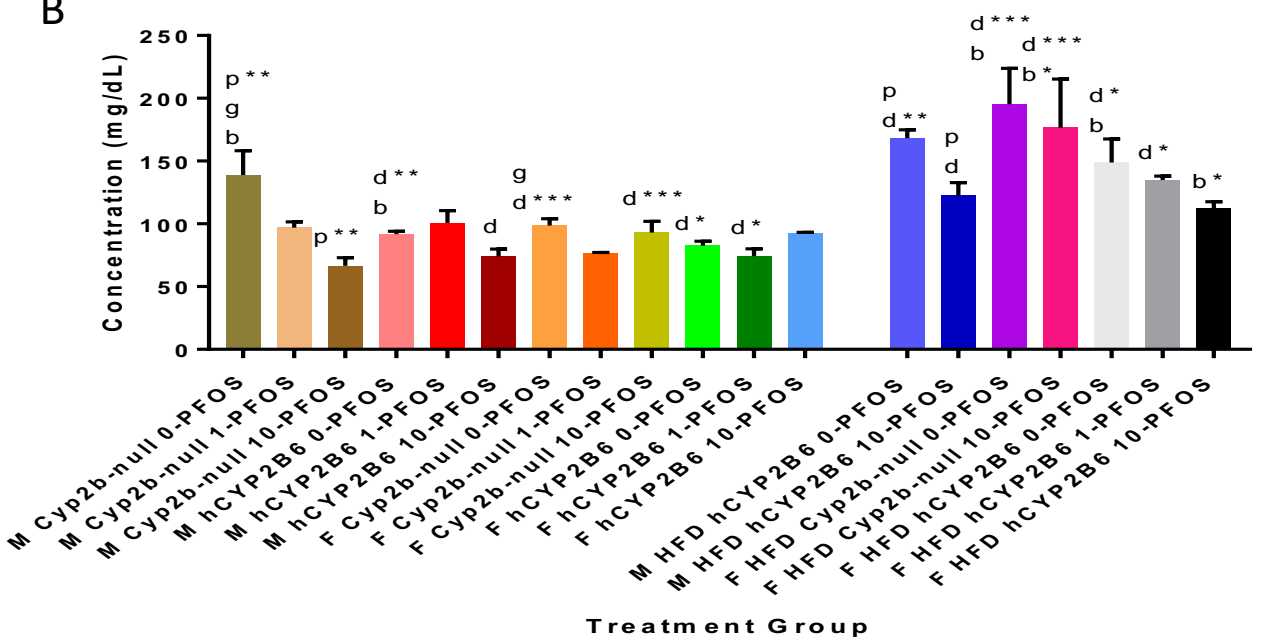

p = significant difference due to PFOS treatment  
g = significant difference due to gender  
d = significant difference due to diet  
b = significant difference due to Cyp2b

**Supplemental Figure 3: Liver (A) and Serum (B) cholesterol levels (n=5).** A serum panel was performed as mentioned in the Materials and Methods and cholesterol levels were measured. Increased serum cholesterol levels in the mice fed a high-fat diet with a significant increase in the cholesterol levels in Cyp2b-null mice fed a high-fat diet, regardless of PFOS concentration, compared to their hCYP2B6 counterparts. Data are presented as mean  $\pm$  SEM. Statistical significance was determined by one-way ANOVA followed by Fisher's LSD as the post-hoc test. A letter indicates a  $p < 0.05$ , letter w/ \* indicates  $p < 0.01$ , letter w/ \*\* indicates  $p < 0.001$  and a letter w/ \*\*\* indicates  $p < 0.0001$ .

## LDH

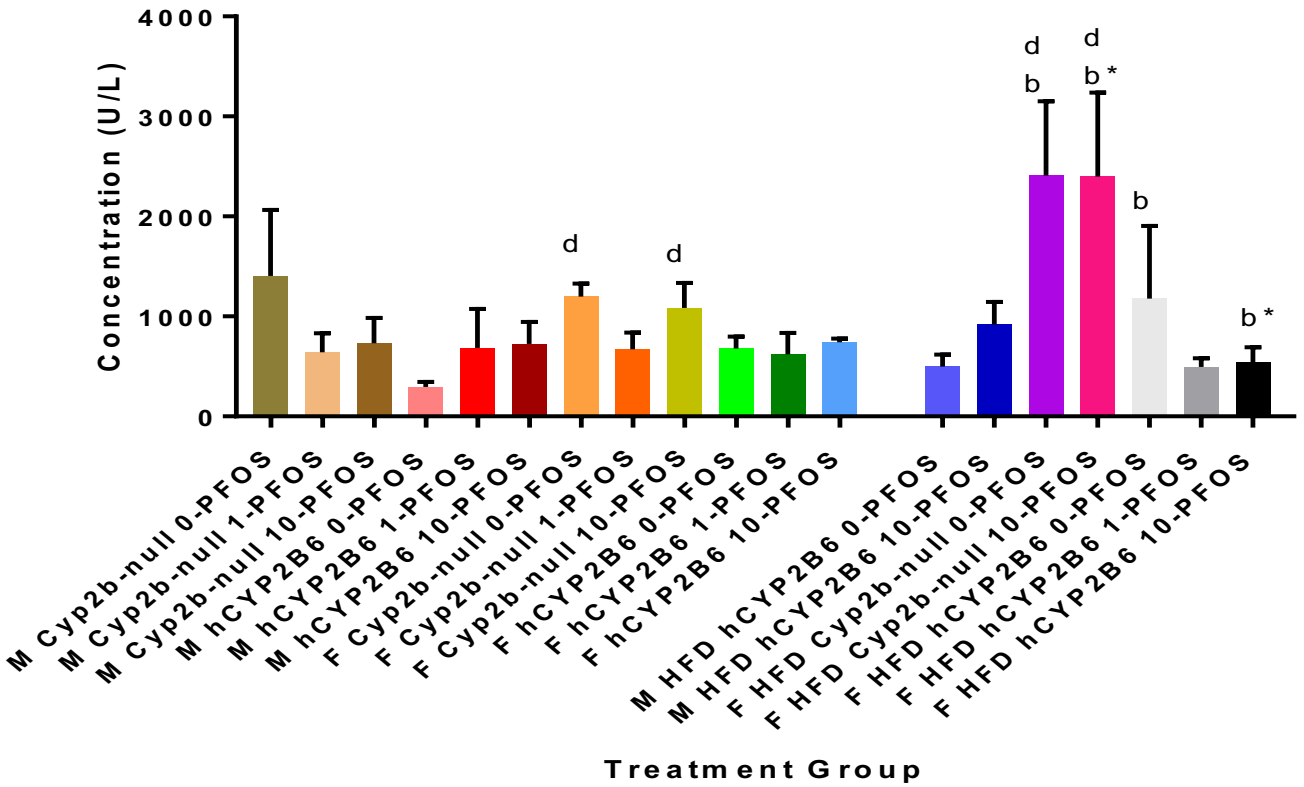

p = significant difference due to PFOS treatment  
 g = significant difference due to gender  
 d = significant difference due to diet  
 b = significant difference due to Cyp2b

**Supplemental Figure 4: Serum lactate dehydrogenase (LDH) levels (n=5).** A serum panel was performed as mentioned in the Materials and Methods and LDH levels were measured. Significant increase of LDH levels in Cyp2b-null mice fed a high-fat diet regardless of PFOS concentration compared to their hCYP2B6 counterparts. Data are presented as mean  $\pm$  SEM. Statistical significance was determined by one-way ANOVA followed by Fisher's LSD as the post-hoc test. A letter indicates a  $p < 0.05$ , and a letter w/ \* indicates  $p < 0.01$ .

A

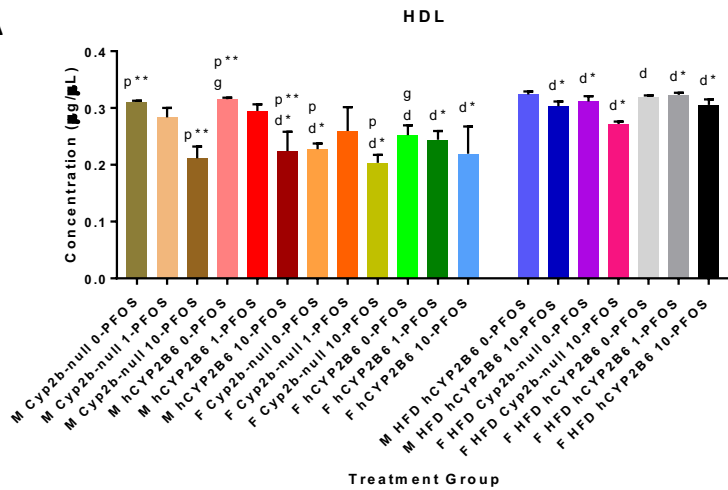

p = significant difference due to PFOS treatment  
 g = significant difference due to gender  
 d = significant difference due to diet  
 b = significant difference due to Cyp2b

B

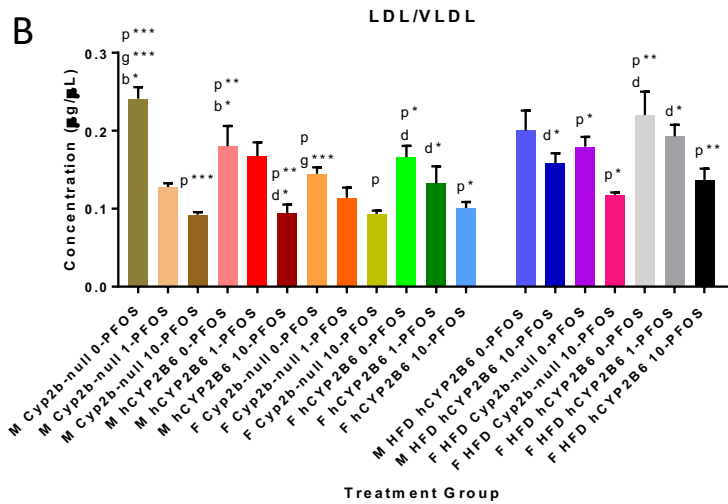

p = significant difference due to PFOS treatment  
 g = significant difference due to gender  
 d = significant difference due to diet  
 b = significant difference due to Cyp2b

**Supplemental Figure 5: Serum HDL (A) and LDL/VLDL (B) analysis (n=4).** Total serum HDL and LDL/VLDL cholesterol was determined using the HDL and LDL/VLDL Colorimetric Quantitation Assay from Sigma Aldrich (St. Louis, MO). The total HDL and LDL/VLDL cholesterol concentrations were determined according to the manufacturer's instructions. PFOS suppresses both HDL and LDL/VLDL in all mice. Data are presented as mean ± SEM. Statistical significance was determined by one-way ANOVA followed by Fisher's LSD as the post-hoc test (n=5). A letter indicates a  $p < 0.05$ , letter w/ \* indicates  $p < 0.01$ , letter w/ \*\* indicates  $p < 0.001$  and a letter w/ \*\*\* indicates  $p < 0.0001$ .
